# Supplementary material
Source: publisher figshare collection journal article supplement (https://frontiersin.figshare.com/ndownloader/files/34352066)
Supplement: Supplementary file 1 [file 34352066]

**Table A4**: Sample: Number of county party branches nominating the MP jointly

|  | **Number of county party branches (Kreisverbände)** | | | |
| --- | --- | --- | --- | --- |
|  | 1 | 2 | 3 | 4 |
| **N** | 11 | 17 | 5 | - |
| **% in sample** | 34,4% | 50,0% | 15,6% | 0% |
| **% in population** | 31,8% | 45,4% | 20,6% | 2,3% |

Source: Own research, see for details Reiser 2014
